# Supplementary material
Source: PubMed Central journal article supplement (PMC539730)
Supplement: pnas_101_51_17687__1.pdf [file pnas_101_51_17687__1.pdf]

**Table 1. Changes in expression level by gene group and experimental ligand**

| ligand | time (h) | SOM Gene Group Number |      |      |      |      |      |      |      |      |      |      | Continued... | ligand | time (h) | SOM Gene Group Number |      |      |      |      |      |      |      |      |      |      |      |
|--------|----------|-----------------------|------|------|------|------|------|------|------|------|------|------|--------------|--------|----------|-----------------------|------|------|------|------|------|------|------|------|------|------|------|
|        |          | 0                     | 1    | 2    | 3    | 4    | 5    | 6    | 7    | 8    | 9    | 10   |              |        |          | 11                    | 0    | 1    | 2    | 3    | 4    | 5    | 6    | 7    | 8    | 9    | 10   |
| 1      | 0.5      | 0.29                  | 0.38 | 0.56 | 0.66 | 0.17 | 0.26 | 0.43 | 0.43 | -0   | 0.11 | 0.27 | 0.36         | 18     | 0.5      | 0.11                  | 0.28 | 0.5  | 0.75 | 0.03 | 0.24 | 0.41 | 0.54 | -0.2 | 0.09 | 0.28 | 0.42 |
| 1      | 1        | -0.2                  | -0   | 0.28 | 0.48 | -0.2 | 0.03 | 0.22 | 0.23 | -0.5 | -0.3 | -0.1 | 0.07         | 18     | 1        | 0.13                  | 0.37 | 0.79 | 1.36 | 0.12 | 0.54 | 0.93 | 1.12 | -0.1 | 0.32 | 0.63 | 0.92 |
| 1      | 2        | -0.1                  | 0.12 | 0.4  | 0.53 | -0.3 | -0   | 0.14 | 0.21 | -0.7 | -0.3 | -0.1 | 0.03         | 18     | 2        | 0.33                  | 0.52 | 0.84 | 1.1  | 0.12 | 0.36 | 0.62 | 0.8  | -0.3 | 0.16 | 0.44 | 0.64 |
| 1      | 4        | -0.1                  | 0.11 | 0.41 | 0.5  | -0.4 | -0.1 | 0.18 | 0.17 | -0.8 | -0.4 | -0.1 | 0.03         | 18     | 4        | 0.08                  | 0.26 | 0.55 | 0.82 | -0.3 | -0   | 0.24 | 0.48 | -0.7 | -0.2 | 0.11 | 0.33 |
| 2      | 0.5      | 0.33                  | 0.4  | 0.51 | 1.1  | 0.13 | 0.3  | 0.51 | 0.84 | -0   | 0.25 | 0.53 | 0.68         | 19     | 0.5      | 0.31                  | 0.49 | 0.68 | 1.12 | 0.14 | 0.34 | 0.52 | 0.83 | -0.1 | 0.28 | 0.47 | 0.64 |
| 2      | 1        | 0.12                  | 0.22 | 0.41 | 0.8  | -0.1 | 0.05 | 0.28 | 0.55 | -0.3 | -0.1 | 0.2  | 0.4          | 19     | 1        | -0                    | 0.17 | 0.44 | 0.81 | -0.2 | 0.05 | 0.3  | 0.48 | -0.5 | -0.1 | 0.13 | 0.3  |
| 2      | 2        | 0.4                   | 0.63 | 0.89 | 1.44 | 0.2  | 0.43 | 0.72 | 1.06 | -0.1 | 0.37 | 0.64 | 0.84         | 19     | 2        | 0.54                  | 0.73 | 0.99 | 1.28 | 0.31 | 0.54 | 0.73 | 0.94 | -0   | 0.39 | 0.62 | 0.79 |
| 2      | 4        | 0.15                  | 0.38 | 0.66 | 1.14 | -0.1 | 0.11 | 0.41 | 0.75 | -0.5 | -0   | 0.31 | 0.53         | 19     | 4        | 0.03                  | 0.23 | 0.48 | 0.7  | -0.2 | -0.1 | 0.19 | 0.37 | -0.6 | -0.2 | 0.06 | 0.2  |
| 3      | 0.5      | -0.1                  | -0   | 0.18 | 0.31 | -0.2 | -0   | 0.11 | 0.04 | -0.4 | -0.3 | -0.1 | 0            | 20     | 0.5      | -0.3                  | -0.2 | 0.02 | 0.51 | -0.4 | -0.2 | 0.11 | 0.32 | -0.5 | -0.3 | -0   | 0.18 |
| 3      | 1        | -0                    | 0.13 | 0.34 | 0.51 | -0.1 | -0.1 | 0.11 | 0.07 | -0.6 | -0.3 | -0.2 | -0           | 20     | 1        | 0.19                  | 0.41 | 0.68 | 0.91 | 0.13 | 0.37 | 0.59 | 0.6  | -0.1 | 0.1  | 0.31 | 0.48 |
| 3      | 2        | -0                    | 0.16 | 0.55 | 0.51 | -0.2 | -0.1 | 0.14 | 0.05 | -0.8 | -0.7 | -0.3 | -0.1         | 20     | 2        | -0.1                  | 0.12 | 0.48 | 0.97 | -0.2 | 0.14 | 0.47 | 0.68 | -0.6 | -0.1 | 0.22 | 0.46 |
| 3      | 4        | 0.11                  | 0.31 | 0.69 | 0.53 | -0.3 | -0.2 | 0.03 | 0.09 | -1.1 | -0.7 | -0.3 | -0.1         | 20     | 4        | -0.2                  | 0.14 | 0.43 | 0.76 | -0.4 | -0.1 | 0.28 | 0.42 | -0.8 | -0.4 | -0   | 0.2  |
| 4      | 0.5      | 0.43                  | 0.51 | 0.71 | 0.88 | 0.35 | 0.51 | 0.65 | 0.68 | 0.21 | 0.32 | 0.48 | 0.58         | 21     | 0.5      | 0.19                  | 0.31 | 0.52 | 1.05 | 0.06 | 0.28 | 0.46 | 0.81 | -0.1 | 0.2  | 0.44 | 0.63 |
| 4      | 1        | -0.1                  | 0.06 | 0.3  | 0.37 | -0.1 | -0   | 0.15 | 0.11 | -0.4 | -0.3 | -0.1 | -0           | 21     | 1        | -0.2                  | -0   | 0.28 | 0.91 | -0.3 | -0   | 0.23 | 0.62 | -0.6 | -0.1 | 0.17 | 0.4  |
| 4      | 2        | 0.23                  | 0.49 | 0.81 | 0.75 | 0.06 | 0.22 | 0.44 | 0.38 | -0.4 | -0.3 | 0.03 | 0.21         | 21     | 2        | 0.19                  | 0.41 | 0.67 | 1.05 | -0.1 | 0.14 | 0.35 | 0.68 | -0.5 | -0   | 0.25 | 0.49 |
| 4      | 4        | 0.22                  | 0.38 | 0.74 | 0.48 | -0.1 | -0.1 | 0.16 | 0.15 | -0.8 | -0.4 | -0.2 | -0           | 21     | 4        | 0.01                  | 0.21 | 0.61 | 0.83 | -0.4 | -0.2 | 0.1  | 0.42 | -1.1 | -0.5 | -0.1 | 0.16 |
| 5      | 0.5      | -0.2                  | -0.1 | 0.12 | 0.55 | -0.3 | -0.1 | 0.09 | 0.31 | -0.5 | -0.2 | -0   | 0.13         | 22     | 0.5      | 0.16                  | 0.26 | 0.47 | 1.02 | 0.01 | 0.18 | 0.34 | 0.73 | -0.2 | 0.24 | 0.4  | 0.55 |
| 5      | 1        | -0                    | 0.18 | 0.44 | 1    | -0.1 | 0.13 | 0.37 | 0.68 | -0.4 | -0   | 0.28 | 0.47         | 22     | 1        | 0.37                  | 0.5  | 0.75 | 1.33 | 0.14 | 0.33 | 0.58 | 0.94 | -0.2 | 0.43 | 0.59 | 0.76 |
| 5      | 2        | -0.3                  | -0.1 | 0.23 | 0.74 | -0.4 | -0.2 | 0.09 | 0.41 | -0.8 | -0.3 | -0   | 0.2          | 22     | 2        | 0.38                  | 0.53 | 0.78 | 1.3  | 0.11 | 0.33 | 0.54 | 0.96 | -0.2 | 0.31 | 0.61 | 0.79 |
| 5      | 4        | -0.1                  | 0.17 | 0.52 | 1.08 | -0.2 | 0.05 | 0.46 | 0.77 | -0.7 | -0.1 | 0.26 | 0.51         | 22     | 4        | 0.17                  | 0.34 | 0.67 | 1.33 | -0.1 | 0.26 | 0.6  | 0.98 | -0.5 | 0.22 | 0.48 | 0.75 |
| 6      | 0.5      | 0.11                  | 0.23 | 0.49 | 0.8  | -0   | 0.17 | 0.34 | 0.47 | -0.3 | -0.2 | 0.16 | 0.3          | 23     | 0.5      | 0.22                  | 0.35 | 0.52 | 1.08 | 0.06 | 0.29 | 0.48 | 0.84 | -0.1 | 0.28 | 0.46 | 0.67 |
| 6      | 1        | 0.15                  | 0.32 | 0.67 | 0.98 | -0   | 0.15 | 0.43 | 0.56 | -0.4 | -0.1 | 0.17 | 0.35         | 23     | 1        | 0.32                  | 0.51 | 0.77 | 1.16 | 0.18 | 0.45 | 0.63 | 0.88 | -0.1 | 0.25 | 0.5  | 0.68 |
| 6      | 2        | 0.49                  | 0.62 | 0.91 | 1.26 | 0.19 | 0.36 | 0.54 | 0.87 | -0.2 | 0.25 | 0.57 | 0.72         | 23     | 2        | 0.33                  | 0.53 | 0.82 | 1.19 | 0.07 | 0.34 | 0.59 | 0.86 | -0.3 | 0.26 | 0.5  | 0.7  |
| 6      | 4        | 0.22                  | 0.42 | 0.84 | 1.13 | 0.04 | 0.25 | 0.64 | 0.73 | -0.5 | -0   | 0.29 | 0.47         | 23     | 4        | 0.35                  | 0.6  | 0.92 | 1.31 | 0.13 | 0.44 | 0.79 | 1.01 | -0.3 | 0.29 | 0.6  | 0.82 |
| 7      | 0.5      | 0.07                  | 0.2  | 0.48 | 0.85 | 0.02 | 0.28 | 0.45 | 0.57 | -0.2 | 0.05 | 0.26 | 0.41         | 24     | 0.5      | 0.04                  | 0.19 | 0.41 | 0.8  | -0.1 | 0.17 | 0.38 | 0.5  | -0.3 | -0   | 0.19 | 0.33 |
| 7      | 1        | -0.1                  | 0.12 | 0.44 | 0.73 | -0.2 | 0.06 | 0.28 | 0.4  | -0.6 | -0.2 | 0.02 | 0.21         | 24     | 1        | 0.32                  | 0.51 | 0.84 | 1.34 | 0.24 | 0.56 | 0.86 | 1.05 | 0.01 | 0.42 | 0.65 | 0.86 |
| 7      | 2        | 0.24                  | 0.44 | 0.72 | 0.92 | 0.03 | 0.19 | 0.43 | 0.59 | -0.4 | 0.04 | 0.28 | 0.45         | 24     | 2        | -0                    | 0.14 | 0.41 | 0.49 | -0.2 | -0   | 0.18 | 0.2  | -0.6 | -0.3 | -0   | 0.07 |
| 7      | 4        | 0.1                   | 0.24 | 0.56 | 0.82 | -0.2 | -0   | 0.22 | 0.4  | -0.7 | -0.2 | 0.08 | 0.25         | 24     | 4        | 0.47                  | 0.68 | 0.93 | 1.33 | 0.16 | 0.41 | 0.68 | 0.97 | -0.2 | 0.3  | 0.6  | 0.8  |
| 8      | 0.5      | 0.13                  | 0.26 | 0.52 | 1.19 | 0.07 | 0.33 | 0.59 | 0.94 | -0.1 | 0.37 | 0.57 | 0.75         | 25     | 0.5      | 0.14                  | 0.29 | 0.54 | 1.06 | -0   | 0.19 | 0.43 | 0.79 | -0.3 | 0.16 | 0.44 | 0.61 |
| 8      | 1        | 0.35                  | 0.52 | 0.85 | 1.48 | 0.22 | 0.49 | 0.77 | 1.21 | -0   | 0.5  | 0.74 | 0.99         | 25     | 1        | -0                    | 0.12 | 0.38 | 1.03 | -0.2 | 0.04 | 0.34 | 0.71 | -0.5 | 0.05 | 0.31 | 0.5  |
| 8      | 2        | 0.15                  | 0.29 | 0.55 | 1.06 | -0.1 | 0.13 | 0.37 | 0.79 | -0.4 | 0.12 | 0.4  | 0.59         | 25     | 2        | 0.1                   | 0.3  | 0.6  | 1.24 | -0   | 0.25 | 0.55 | 0.93 | -0.3 | 0.19 | 0.5  | 0.71 |
| 8      | 4        | -0                    | 0.16 | 0.53 | 1.13 | -0.2 | 0.05 | 0.38 | 0.8  | -0.6 | 0.01 | 0.31 | 0.55         | 25     | 4        | 0.21                  | 0.41 | 0.68 | 1.3  | 0.01 | 0.28 | 0.58 | 1.01 | -0.4 | 0.24 | 0.57 | 0.79 |
| 9      | 0.5      | 0.01                  | 0.09 | 0.24 | 0.7  | -0.1 | 0.03 | 0.22 | 0.48 | -0.3 | 0.01 | 0.21 | 0.33         | 26     | 0.5      | -0.1                  | 0.04 | 0.26 | 0.92 | -0.1 | -0   | 0.28 | 0.66 | -0.3 | 0.07 | 0.26 | 0.48 |
| 9      | 1        | 0.06                  | 0.24 | 0.54 | 1.13 | -0   | 0.25 | 0.5  | 0.82 | -0.3 | 0.11 | 0.4  | 0.62         | 26     | 1        | 0.01                  | 0.12 | 0.36 | 0.91 | -0.2 | -0   | 0.18 | 0.62 | -0.4 | 0.04 | 0.24 | 0.44 |
| 9      | 2        | -0.2                  | -0   | 0.32 | 0.78 | -0.4 | -0.2 | 0.12 | 0.41 | -0.7 | -0.3 | -0   | 0.21         | 26     | 2        | 0.05                  | 0.22 | 0.46 | 1.09 | -0.1 | 0.08 | 0.33 | 0.78 | -0.4 | 0.04 | 0.36 | 0.57 |
| 9      | 4        | 0.13                  | 0.38 | 0.74 | 1.1  | -0.2 | 0.03 | 0.36 | 0.71 | -0.7 | -0.2 | 0.19 | 0.43         | 26     | 4        | 0.28                  | 0.44 | 0.79 | 1.27 | -0   | 0.17 | 0.48 | 0.92 | -0.5 | 0.13 | 0.43 | 0.68 |
| 10     | 0.5      | -0.1                  | 0.03 | 0.26 | 0.86 | -0.2 | 0.07 | 0.35 | 0.64 | -0.3 | -0   | 0.25 | 0.44         | 27     | 0.5      | -0.1                  | 0.13 | 0.29 | 0.6  | -0.2 | -0   | 0.18 | 0.3  | -0.4 | -0.1 | 0.05 | 0.16 |
| 10     | 1        | 0.06                  | 0.21 | 0.47 | 0.92 | -0.1 | 0.12 | 0.33 | 0.61 | -0.4 | 0.07 | 0.27 | 0.41         | 27     | 1        | 0.03                  | 0.27 | 0.54 | 0.85 | -0.1 | 0.15 | 0.42 | 0.78 | -0.4 | -0.2 | 0.03 | 0.14 |
| 10     | 2        | -0.2                  | 0.03 | 0.37 | 0.82 | -0.3 | -0.1 | 0.21 | 0.53 | -0.7 | -0.1 | 0.16 | 0.34         | 27     | 2        | 0.31                  | 0.56 | 0.84 | 1.36 | 0.16 | 0.41 | 0.75 | 1.04 | -0.2 | 0.27 | 0.6  | 0.83 |
| 10     | 4        | 0.18                  | 0.39 | 0.76 | 1.3  | -0.1 | 0.22 | 0.56 | 0.93 | -0.5 | 0.18 | 0.45 | 0.7          | 27     | 4        | -0                    | 0.31 | 0.57 | 0.7  | -0.2 | 0.06 | 0.39 | 0.47 | -0.7 | -0.3 | 0.02 | 0.15 |
| 11     | 0.5      | 0.06                  | 0.16 | 0.36 | 0.86 | -0.1 | 0.12 | 0.31 | 0.64 | -0.2 | 0.1  | 0.31 | 0.47         | 28     | 0.5      | -0.2                  | -0.1 | 0.16 | 0.62 | -0.3 | -0   | 0.22 | 0.45 | -0.5 | -0.2 | 0.06 | 0.24 |
| 11     | 1        | -0.1                  | 0.1  | 0.4  | 0.77 | -0.2 | 0.03 | 0.21 | 0.45 | -0.5 | -0.1 | 0.11 | 0.3          | 28     | 1        | 0.11                  | 0.32 | 0.56 | 0.8  | -0   | 0.17 | 0.37 | 0.52 | -0.4 | -0   | 0.2  | 0.36 |
| 11     | 2        | -0.1                  | 0.07 | 0.41 | 0.88 | -0.3 | -0   | 0.24 | 0.57 | -0.6 | -0.2 | 0.17 | 0.35         | 28     | 2        | -0.3                  | -0.1 | 0.25 | 0.71 | -0.4 | -0.1 | 0.16 | 0.43 | -0.8 | -0.3 | 0    | 0.22 |
| 11     | 4        | 0.37                  | 0.56 | 0.82 | 1.25 | 0.07 | 0.26 | 0.54 | 0.92 | -0.3 | 0.21 | 0.52 | 0.74         | 28     | 4        | 0.05                  | 0.29 | 0.56 | 0.91 | -0.2 | 0.06 | 0.33 | 0.56 | -0.6 | -0.1 | 0.15 | 0.36 |
| 12     | 0.5      | 0.19                  | 0.34 | 0.53 | 0.99 | 0.09 | 0.28 | 0.48 | 0.74 | -0.1 | 0.24 | 0.42 | 0.58         | 29     | 0.5      | -0.1                  | 0.19 | 0.48 | 0.36 | -0   | 0.18 | 0.4  | 0.01 | -0.3 | -0.3 | -0.1 | -0.1 |
| 12     | 1        | 0.04                  | 0.27 | 0.48 | 0.64 | -0.1 | 0.11 | 0.26 | 0.38 | -0.3 | -0.1 | 0.11 | 0.25         | 29     | 1        | -0.2                  | 0.04 | 0.5  | 0.45 | -0.1 | 0.06 | 0.43 | 0.04 | -0.6 | -0.7 | -0.3 | -0.2 |
| 12     | 2        | 0.21                  | 0.43 | 0.68 | 1.03 | -0   | 0.26 | 0.47 | 0.72 | -0.4 | 0.16 | 0.34 | 0.53         | 29     | 2        | 0.07                  | 0.28 | 0.48 | 0.26 | -0.2 | -0.2 | 0.03 | -0.2 | -0.6 | -0.5 | -0.3 | -0.2 |
| 12     | 4        | 0.19                  | 0.44 | 0.67 | 0.85 | -0.1 | 0.13 | 0.35 | 0.45 | -0.5 | -0.1 | 0.18 | 0.34         | 29     | 4        | -0                    | 0.29 | 0.64 | 0.78 | -0.2 | 0.14 | 0.55 | 0.38 | -0.7 | -0.4 | -0   | 0.14 |
| 13     | 0.5      | 0.25                  | 0.38 | 0.56 | 1.19 | 0.09 | 0.26 | 0.46 | 0.88 | -0.1 | 0.34 | 0.54 | 0.7          | 30     | 0.5      | -0.1                  | 0.02 | 0.27 | 0.74 | -0.2 | 0.01 | 0.24 | 0.47 | -0.4 | -0.1 | 0.07 | 0.28 |
| 13     | 1        | 0.38                  | 0.52 | 0.8  | 1.38 | 0.16 | 0.43 | 0.63 | 1.07 | -0.1 | 0.42 | 0.68 | 0.85         | 30     | 1        | 0.09                  | 0.31 | 0.65 | 0.86 | -0   | 0.18 | 0.44 | 0.54 | -0.4 | -0.1 | 0.15 | 0.33 |
| 13     | 2        | 0.24                  | 0.41 | 0.66 | 1.17 | -0.1 | 0.16 | 0.38 | 0.81 | -0.4 | 0.16 | 0.42 | 0.61         | 30     | 2        | -0                    | 0.22 | 0.51 | 0.7  | -0.2 | 0.   |      |      |      |      |      |      |
