# Supplementary material
Source: PubMed Central journal article supplement (PMC539730)

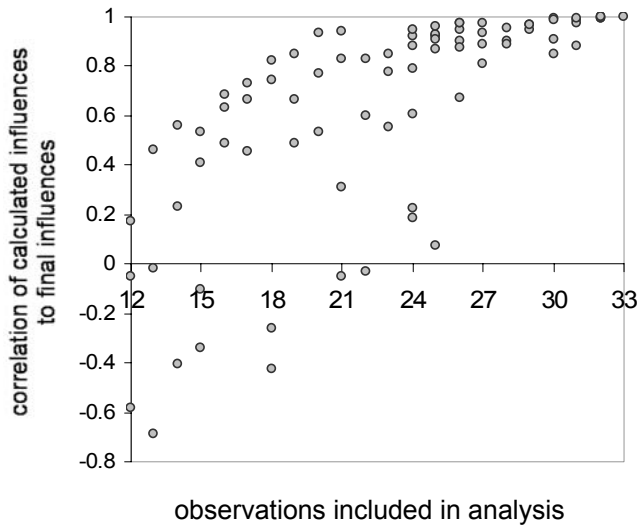

Supplement: pnas_101_51_17687__3.pdf [file pnas_101_51_17687__3.pdf]

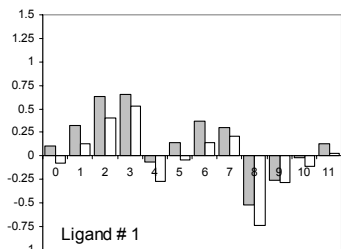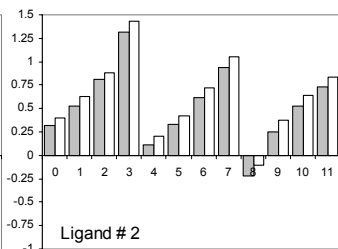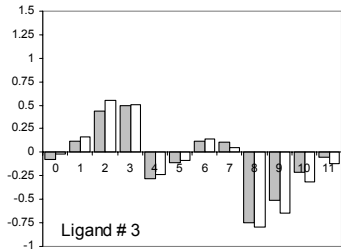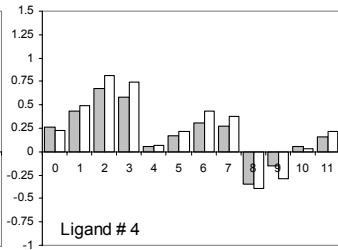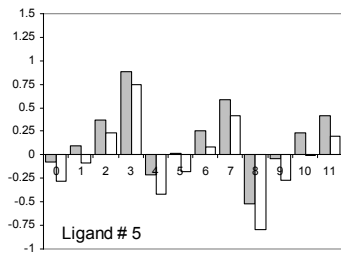

gene group

Supplement: pnas_101_51_17687__4.pdf [file pnas_101_51_17687__4.pdf]
